# Supplementary material for: A {Na2Fe10} isobutyrate cluster, interlinked into 1D chains
Source: Royal Society of Chemistry journal article supplement (doi:10.1039/d1ce00777g), 2021-01-01
Supplement: d1ce00777g1.pdf [file d1ce00777g1.pdf]

## Electronic Supplementary Information

### A {Na<sub>2</sub>Fe<sub>10</sub>} isobutyrate cluster, interlinked into 1D chains

Daniel Podgornii,<sup>a</sup> Jan van Leusen,<sup>b</sup> Victor Ch. Kravtsov,<sup>a</sup> Paul Kögerler\*<sup>b</sup> and  
Svetlana G. Baca\*<sup>a</sup>

<sup>a</sup>*Institute of Applied Physics, 2028 Chisinau, R. Moldova.*

<sup>b</sup>*Institute of Inorganic Chemistry, RWTH Aachen University, 52074 Aachen, Germany.*

#### Experimental part

**Materials and methods.** All reactions were performed under aerobic conditions using chemicals and solvents that were used as received without further purification. The precursor compound [Fe<sub>3</sub>O(ib)<sub>6</sub>(H<sub>2</sub>O)<sub>3</sub>]NO<sub>3</sub>·2H<sub>2</sub>O was prepared using a published procedure (O. Botezat, J. van Leusen, V. Ch. Kravtsov, A. Ellern, P. Kögerler and S. G. Baca, *Dalton Trans.*, 2015, **44**, 20753). **Caution! Care should be taken when using the potentially explosive sodium azide.** A WiseClean ultrasonic bath, operating at 42 kHz with maximum power of 120 W was used for ultrasonic irradiation. FTIR spectrum (4000 – 700 cm<sup>-1</sup>) was recorded on a FTIR PerkinElmer spectrometer. Thermogravimetric analysis/differential thermal analysis (TGA/DTA) measurements were performed with AUTOSORB 1 in nitrogen atmosphere at a heating rate 10 K·min<sup>-1</sup> from 20 – 1000 °C.

Magnetic properties were determined using a Quantum Design MPMS-5XL SQUID magnetometer. A microcrystalline sample of **1** was compacted and immobilized into a cylindrical PTFE sample holder. The data were recorded at 0.1 Tesla in the temperature range 2.0 – 290 K, and at 2.0 K in the field range 0.1 – 5.0 Tesla. They were corrected for the diamagnetic contributions of the sample holder and the intrinsic contribution of the compound ( $\chi_{m,dia} = -1.16 \times 10^{-3} \text{ cm}^3 \text{ mol}^{-1}$ ).

**Synthesis of [Na<sub>2</sub>Fe<sub>10</sub>O<sub>6</sub>(OH)<sub>4</sub>(ib)<sub>14</sub>(bpy)(MeO)<sub>2</sub>(MeCN)<sub>2</sub>]□MeOH (**1**).** A solution of [Fe<sub>3</sub>O(ib)<sub>6</sub>(H<sub>2</sub>O)<sub>3</sub>]NO<sub>3</sub>·2H<sub>2</sub>O (0.087 g, 0.1 mmol), pyrazole (0.013 g, 0.19 mmol), 4,4'-bipyridine (0.015 g, 0.1 mmol) and NaN<sub>3</sub> (0.02 g; 0.3 mmol) in 10 mL of MeCN was ultrasonicated for 70 min at 60 °C and then filtered. The filtrate was allowed to slowly evaporate at room temperature. After 2 weeks brown crystals of **1** were filtered off, washed with water and isopropanol and dried in air. Yield: 0.051 g (23% based on Fe). Characteristic IR bands (cm<sup>-1</sup>): ν(OH): 3676 (m); ν(C-H): 2971 (s, br), 2902 (sh); ν(COO): 1585 (vs), 1422 (vs); δ(C-H): 1470 (m), 1376 (m).

**Single-crystal X-ray diffraction crystallographic analysis.** Single-crystal X-ray diffraction experiment for **1** was performed at 293 K on an Oxford Xcalibur CCD diffractometer with graphite-monochromatized Mo K $\alpha$  radiation. Full crystallographic data and refinement details of **1** are provided in Table S1. The position of metal atoms was located by direct methods. The remaining atoms were found in an alternating series of least-square cycles and difference Fourier maps. All non-hydrogen atoms were refined in full-matrix anisotropic approximation using the SHELX software package. All hydrogen atoms were placed at idealized position and were allowed to ride on the neighboring atoms. Selected bond distances and angles for **1** are listed in Table S2. CCDC 2088628.

**Table S1.** Crystal data and details of structural determination for compound **1**

| [Na <sub>2</sub> Fe <sub>10</sub> O <sub>6</sub> (OH) <sub>4</sub> (ib) <sub>14</sub> (bpy)(MeO) <sub>2</sub> (MeCN) <sub>2</sub> ] $\cdot$ MeOH |                                                                                                  |
|--------------------------------------------------------------------------------------------------------------------------------------------------|--------------------------------------------------------------------------------------------------|
| Empirical formula                                                                                                                                | C <sub>73</sub> H <sub>126</sub> Fe <sub>10</sub> N <sub>4</sub> Na <sub>2</sub> O <sub>41</sub> |
| $M_r$ / g mol <sup>-1</sup>                                                                                                                      | 2320,21                                                                                          |
| Wavelength / Å                                                                                                                                   | 0.71073                                                                                          |
| Radiation type                                                                                                                                   | MoK $\alpha$                                                                                     |
| $T$ / K                                                                                                                                          | 293                                                                                              |
| Crystal system                                                                                                                                   | Monoclinic                                                                                       |
| Space group                                                                                                                                      | $C2/c$                                                                                           |
| Unit cell dimensions                                                                                                                             |                                                                                                  |
| $a$ / Å                                                                                                                                          | 25.2017(13)                                                                                      |
| $b$ / Å                                                                                                                                          | 18.1205(12)                                                                                      |
| $c$ / Å                                                                                                                                          | 24.0709(10)                                                                                      |
| $\alpha$                                                                                                                                         | 90°                                                                                              |
| $\beta$                                                                                                                                          | 105.576(5)°                                                                                      |
| $\gamma$                                                                                                                                         | 90°                                                                                              |
| $V$ / Å <sup>3</sup>                                                                                                                             | 10588.7(10)                                                                                      |
| $Z$                                                                                                                                              | 4                                                                                                |
| $\rho$ / mg m <sup>-3</sup>                                                                                                                      | 1.455                                                                                            |
| $\mu$ / mm <sup>-1</sup>                                                                                                                         | 1.415                                                                                            |
| Theta range for data collection                                                                                                                  | 3.062° to 25.049°                                                                                |
| Index ranges                                                                                                                                     | $-29 \leq h \leq 30$ , $-12 \leq k \leq 21$ , $-22 \leq l \leq 28$                               |
| Reflections collected                                                                                                                            | 18859                                                                                            |
| Independent reflections                                                                                                                          | 9353 [R(int) = 0.0806]                                                                           |
| Reflections $I \geq 2\sigma(I)$                                                                                                                  | 4589                                                                                             |
| Data / restraints / parameters                                                                                                                   | 9353 / 85 / 635                                                                                  |
| Goodness-of-fit on $F^2$                                                                                                                         | 0.990                                                                                            |
| Final $R$ indices [ $I > 2\sigma(I)$ ]                                                                                                           | $R_1 = 0.0748$ , $wR_2 = 0.1261$                                                                 |
| $R$ indices (all data)                                                                                                                           | $R_1 = 0.1622$ , $wR_2 = 0.1537$                                                                 |
| Largest diff. peak and hole / e $\cdot$ Å <sup>-3</sup>                                                                                          | 0.555 and -0.476                                                                                 |

**Table S2.** Selected bond distances for **1**

| Atom 1 | Atom 2           | Length / Å | Atom 1 | Atom 2           | Length / Å |
|--------|------------------|------------|--------|------------------|------------|
| Fe1    | O1               | 1.891(4)   | Fe4    | O10              | 2.001(5)   |
| Fe1    | O2               | 1.899(5)   | Fe4    | O5 <sup>1</sup>  | 2.054(4)   |
| Fe1    | O3               | 1.931(4)   | Fe4    | O19 <sup>1</sup> | 2.071(5)   |
| Fe1    | O6               | 2.210(5)   | Fe4    | O4               | 2.112(5)   |
| Fe1    | O8               | 2.214(5)   | Fe5    | O2               | 1.906(4)   |
| Fe1    | N1               | 2.249(5)   | Fe5    | O9               | 1.974(5)   |
| Fe1    | Na1 <sup>1</sup> | 3.211(3)   | Fe5    | O12              | 2.010(5)   |
| Fe2    | O3 <sup>1</sup>  | 1.947(4)   | Fe5    | O18              | 2.045(5)   |
| Fe2    | O20              | 1.971(4)   | Fe5    | O4 <sup>1</sup>  | 2.053(4)   |
| Fe2    | O1               | 1.989(4)   | Fe5    | O5               | 2.119(4)   |
| Fe2    | O4               | 2.050(4)   | Na1    | O16              | 2.383(6)   |
| Fe2    | O14              | 2.062(5)   | Na1    | O14              | 2.399(6)   |
| Fe2    | O11              | 2.108(5)   | Na1    | O8 <sup>1</sup>  | 2.409(5)   |
| Fe2    | Fe3              | 2.9300(14) | Na1    | N2               | 2.417(9)   |
| Fe2    | Na1              | 3.337(3)   | Na1    | O6 <sup>1</sup>  | 2.444(6)   |
| Fe3    | O3 <sup>1</sup>  | 1.939(4)   | Na1    | O3 <sup>1</sup>  | 2.460(5)   |
| Fe3    | O20              | 1.970(4)   | Na1    | Fe1 <sup>1</sup> | 3.211(3)   |
| Fe3    | O2               | 1.975(4)   | O3     | Fe3 <sup>1</sup> | 1.939(4)   |
| Fe3    | O16              | 2.041(5)   | O3     | Fe2 <sup>1</sup> | 1.947(4)   |
| Fe3    | O5               | 2.042(4)   | O3     | Na1 <sup>1</sup> | 2.460(5)   |
| Fe3    | O13              | 2.103(5)   | O4     | Fe5 <sup>1</sup> | 2.053(4)   |
| Fe3    | Na1              | 3,340(3)   | O5     | Fe4 <sup>1</sup> | 2.054(4)   |
| Fe4    | O1               | 1.905(4)   | O19    | Fe4 <sup>1</sup> | 2.071(5)   |
| Fe4    | O7               | 1.980(5)   |        |                  |            |

<sup>1</sup> 1/2-x, 3/2-y, 1-z

**Table S3.** Bond valence sums for selected atoms in **1** (K. Knížek, *Kalvados – Software for crystal structure and powder diffraction*; see <http://www.fzu.cz/~knizek/kalvados/index.html>)

| Atom | BVS   | Atom | BVS   |
|------|-------|------|-------|
| Fe1  | 2.91  | O9   | -1.95 |
| Fe2  | 2.99  | O10  | -1.94 |
| Fe3  | 3.06  | O11  | -1.95 |
| Fe4  | 3.01  | O12  | -1.99 |
| Fe5  | 3.03  | O13  | -1.92 |
| O1   | -1.87 | O14  | -1.96 |
| O2   | -1.87 | O15  | -1.58 |
| O3   | -1.93 | O16  | -1.96 |
| O4   | -1.37 | O17  | -1.56 |
| O5   | -1.37 | O18  | -1.97 |
| O6   | -1.95 | O19  | -1.88 |
| O7   | -1.94 | O20  | -2.09 |
| O8   | -1.93 |      |       |

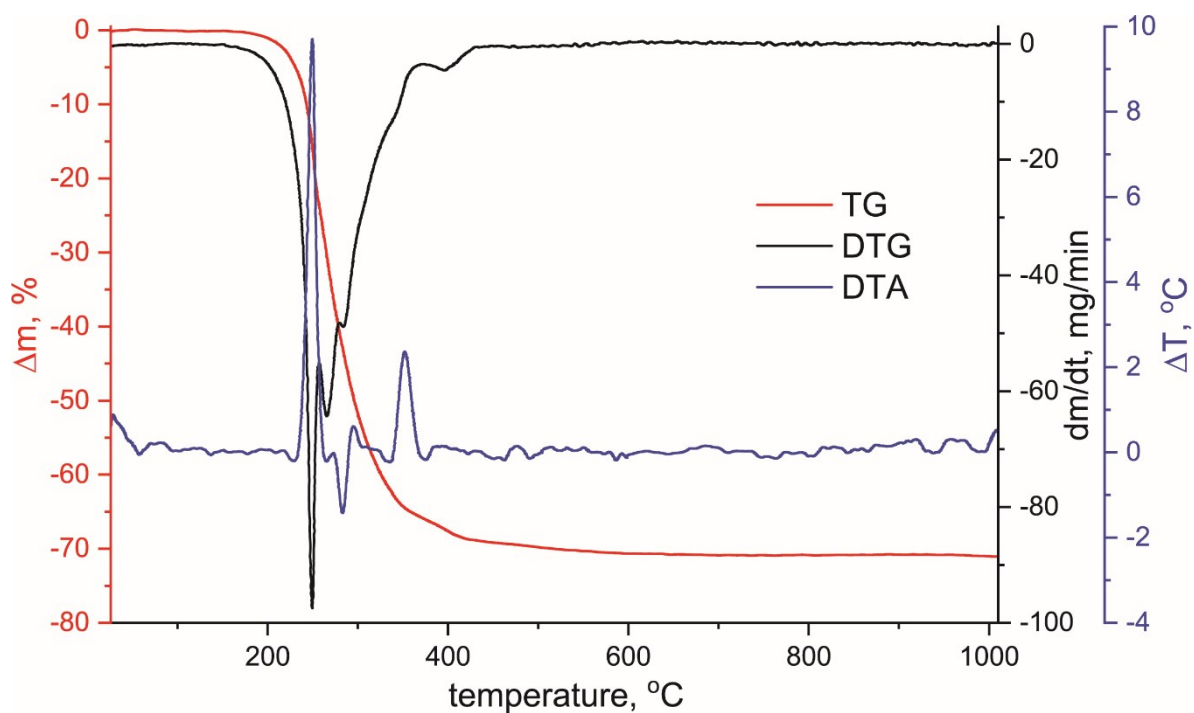

**Figure S1.** TGA/DTG/DTA curves of **1**.
